# Supplementary material for: Clust: automatic extraction of optimal co-expressed gene clusters from gene expression data
Source: PubMed Central journal article supplement (PMC6203272; doi:10.1186/s13059-018-1536-8), 2018-10-25
Supplement: 13059_2018_1536_MOESM3_ESM.pdf [file 13059_2018_1536_MOESM3_ESM.pdf]

# 1 The *Clust* Method

*Clust* is an automatic cluster extraction method that can be applied to a single gene expression dataset or multiple datasets to extract the clusters of co-expressed genes. If a multiple datasets are considered, a cluster of co-expressed genes is defined as a set of genes which are co-expressed with each other in all of those datasets. This document describes the technical details of *clust*.

## 1.1 *Clust* workflow overview

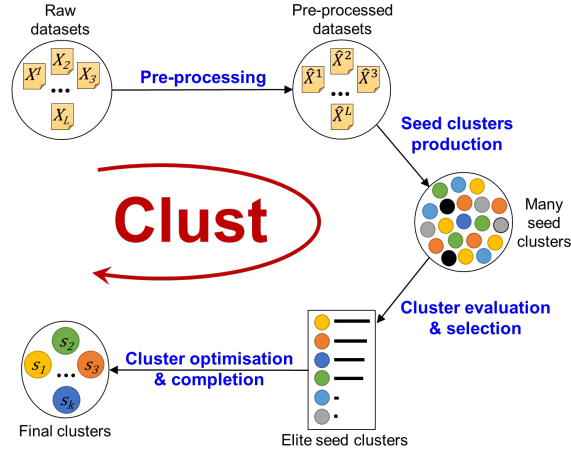

Figure 1: The automatic workflow of *clust*

Figure 1 shows the workflow of *clust*. After *clust* receives the raw dataset(s), it pre-processes them by filtering, summarisation, and normalisation. Then, a large number of seed clusters are produced by the Bi-CoPaM method (binarisation of consensus partition matrices). The M-N scatter plots technique is thereafter applied to select an elite subset of these seed clusters. Finally, a cluster optimisation and completion algorithm is employed to exploit the information in the elite seed clusters in order to produce the final largest, tightest, and non-overlapping clusters of co-expressed genes. Algorithm 1 shows the top-level *clust* procedure, and the next section defines the variables and symbols that are used throughout this document.

---

### Algorithm 1 Clust

---

- 1: **procedure** CLUST( $\mathbf{X}$ ,  $CM=\{KM\}$ ,  $K=4:2:20$ ,  $\Delta=0:0.1:1$ ,  $t=1.0$ ,  $sc=11$ ,  $Q3s=2.0$ )
  - 2:    $\mathbf{X} = \text{Preprocess}(\mathbf{X})$
  - 3:    $R^{seed} = \text{Bicopam}(\mathbf{X}, CM, K, \Delta)$
  - 4:    $(R^{elite}, MND) = \text{MN}(\mathbf{X}, R^{seed}, t, sc)$
  - 5:    $R^{final} = \text{Optimise}(\mathbf{X}, R^{elite}, MND, sc, Q3s)$
  - 6:   Return  $R^{final}$
  - 7: **end procedure**
-

## 1.2 Definition of variables and symbols

This section lists the variables and symbols that are used throughout the description of the steps of *clust*. Few other symbols are used locally in some steps of *clust* and are defined where they are used.

Table 1: Definition of variables and symbols

| Symbol                                 | Description                                                                                                                                                                                                                                            |
|----------------------------------------|--------------------------------------------------------------------------------------------------------------------------------------------------------------------------------------------------------------------------------------------------------|
| $\mathbf{X}$                           | Set of datasets $\{X^l, l \in 1:L\}$                                                                                                                                                                                                                   |
| $X^l$                                  | The $l^{th}$ dataset, which is a matrix of ( $Ng$ genes $\times D^l$ dimensions)                                                                                                                                                                       |
| $CM$                                   | List of base clustering methods; default: {k-means}. Other possible methods include SOMs and HC.                                                                                                                                                       |
| $t$                                    | Tightness parameter; default: 1; tighter clusters: $t > 1$ ; wider clusters: $0 < t < 1$                                                                                                                                                               |
| $sc$                                   | Size of the smallest allowed cluster $\in \mathbb{N}^+$ ; default: 11                                                                                                                                                                                  |
| $Q3s$                                  | Number of $3^{rd}$ quartiles for the optimisation threshold $\in \mathbb{R}^+$ ; default: 2.0                                                                                                                                                          |
| $l, d, g, s, k, \delta,$ and $c$       | Indices always used to refer to a dataset ( $l$ ), a condition ( $d$ ), a gene ( $g$ ), a cluster ( $s$ ), number of clusters in a set of clusters ( $k$ ), a binarisation parameter ( $\delta$ ) value, and a clustering method ( $c$ ), respectively |
| $L$                                    | Number of datasets                                                                                                                                                                                                                                     |
| $D^l$                                  | Number of conditions (dimensions) in the $l^{th}$ dataset                                                                                                                                                                                              |
| $Ng$                                   | Total number of genes in the dataset(s)                                                                                                                                                                                                                |
| $K$                                    | Set of $k$ values $\{k^1 \dots k^{N_k}\}$ for base clustering methods (default: {4, 6, 8, ... , 20})                                                                                                                                                   |
| $N_k$                                  | Number of $k$ values                                                                                                                                                                                                                                   |
| $N_c$                                  | Number of base clustering methods (e.g. k-means)                                                                                                                                                                                                       |
| $\Delta$                               | Set of $\delta$ values                                                                                                                                                                                                                                 |
| $\mathbf{x}_g^l$                       | A vector of the gene expression values of the $g^{th}$ gene in the $l^{th}$ dataset across its $D^l$ conditions                                                                                                                                        |
| $x_{g,d}^l$                            | The gene expression of $g^{th}$ gene at the $d^{th}$ condition of the $l^{th}$ dataset                                                                                                                                                                 |
| $R$                                    | A set of clusters (e.g. clustering result). This is a matrix in which columns represent clusters ( $Ng$ genes $\times k$ clusters)                                                                                                                     |
| $r_{g,s}$                              | An element of a set of clusters ( $R$ ) which represents the membership of the $g^{th}$ gene in the $s^{th}$ cluster. If this clustering result is fuzzy, $r_{g,s} \in [0, 1]$ , and if it is binary, $r_{g,s} \in \{0, 1\}$                           |
| $R^{seed}, R^{elite},$ and $R^{final}$ | Sets of seed clusters, elite clusters, and final clusters, respectively. Each has the structure of $R$                                                                                                                                                 |
| $MND$                                  | List of the M-N distances of the clusters in $R^{elite}$                                                                                                                                                                                               |
| $MND_s$                                | M-N distance of the $s^{th}$ cluster $\in [0, \sqrt{1+t^2}]$                                                                                                                                                                                           |

### 1.3 Seed cluster production (The Bi-CoPaM method)

The Bi-CoPaM (binarisation of consensus partition matrices) method (Algorithm 2) is used to produce a large pool of seed clusters. Given a fixed number of clusters ( $k$  value), a set of datasets ( $\mathbf{X}$ ), a set of base clustering methods ( $CM$ ), Bi-CoPaM applies each one of the base clustering methods to each one of the datasets to produce multiple partitions (clustering results). Then, a consensus fuzzy consensus clustering result ( $FCR$ ) is calculated from these different clustering results. In  $FCR$ , each gene is assigned to each one of the  $k$  clusters with a fuzzy membership value  $\in [0, 1]$ , where 1.0 means it fully belongs to that cluster, 0.0 means it does not belong to it at all, and a value between 0.0 and 1.0 means it partially belongs. Finally,  $FCR$  is binarised by the difference threshold binarisation (DTB) algorithm to produce a binary consensus result ( $BCR$ ) in which membership values are strictly either 1.0 (belongs) or 0.0 (does not belong). Note that the DTB binarisation algorithm requires setting a tuning parameter  $\delta \in [0.0, 1.0]$ .

Thus, given a fixed  $k$  value and a fixed  $\delta$  value, the Bi-CoPaM produces  $k$  consensus clusters, which we call *seed clusters*. In order to explore the space of  $k$  and  $\delta$  values, the Bi-CoPaM produces different versions of seed clusters at every parameter pair ( $k, \delta$ ) taken from a given set of  $k$  values ( $K$ ) and a given set of  $\delta$  values ( $\Delta$ ). By default,  $K = \{4, 6, 8, \dots, 20\}$  and  $\Delta = \{0.0, 0.1, \dots, 1.0\}$ . The pool of seed clusters eventually produced by Bi-CoPaM ( $R^{seed}$ ) therefore includes all of the individual seed clusters produced at all of these ( $k, \delta$ ) parameter pairs.

---

**Algorithm 2** Bi-CoPaM: seed cluster production
 

---

```

1: procedure BICOPAM( $\mathbf{X}$ ,  $CM=\{KM\}$ ,  $K=4:2:20$ ,  $\Delta=0:0.1:1$ )
2:    $R^{seed} = ()$ 
3:   for each  $k$  value in  $K$  do
4:     for each dataset  $X^l$  in  $\mathbf{X}$  do
5:       for each clustering method  $CM^c$  in  $CM$  do
6:          $R_k^{l,c} = \text{Apply}(CM^c, X^l, k)$ 
7:       end for
8:     end for
9:      $FCR_k = \text{FindConsensus}(\mathbf{R}_k)$ 
10:    for each  $\delta$  in  $\Delta$  do
11:       $BCR_k^\delta = \text{Binarise}(FCR_k, \delta)$ 
12:       $R^{seed} = \text{ConcatenateColumns}(R^{seed}, BCR_k^\delta)$ 
13:    end for
14:  end for
15:  Return  $R^{seed}$ 
16: end procedure

```

- ▷  $R_k^{l,c}$ : ( $Ng \times k$ ) matrix; result of applying the  $c^{th}$  method to the  $l^{th}$  dataset at  $k$
- ▷  $\mathbf{R}_k \equiv \{R_k^{l,c} \mid \forall l \forall c\}$ :  $L \times C$  different clustering results at the given  $k$  value
  - ▷  $FCR_k$ : fuzzy consensus result at  $k$ ; ( $Ng \times k$ ) matrix
  - ▷  $FCR_k[g, s] \in [0, 1]$ : fuzzy membership of the  $g^{th}$  gene in the  $s^{th}$  cluster
  - ▷  $BCR_k^\delta$ : binary consensus result at  $k$  and  $\delta$ ; ( $Ng \times k$ ) matrix
  - ▷  $BCR_k^\delta[g, s] \in \{0, 1\}$ : binary membership of the  $g^{th}$  gene in the  $s^{th}$  cluster
  - ▷  $R^{seed}$ : horizontal concatenation of  $BCR_k^\delta$  matrices  $\forall k \in K, \forall \delta \in \Delta$

---

### 1.3.1 Calculating the consensus fuzzy result $FCR$

Algorithm 3 is the algorithm which is used by the Bi-CoPaM to calculate the fuzzy consensus result ( $FCR$ ) from a set of base clustering results  $\mathbf{R}$ . Calculating  $FCR$  from a set of clustering results  $\mathbf{R} = \{R^1 \dots R^{N_r}\}$  is done by straightforward averaging of these results. For example, if a gene is assigned to a cluster in 70% of the base clustering results and to another cluster in 30% of the results, it will have the membership value of 0.7 in the former cluster and 0.3 in the latter cluster. However, as per the nature of clustering algorithms, if there are two clustering results for the same dataset, it is not guaranteed that the  $s^{th}$  cluster from in the first result corresponds to the  $s^{th}$  cluster in the second result. Therefore, the  $k$  clusters in each one of these clustering results must be relabelled (re-ordered) so that the  $s^{th}$  cluster in any of the results  $R^r$  corresponds to the  $s^{th}$  cluster in each one of the other results  $\{R^1 \dots R^{N_r}\}$ .

Relabelling (reordering) the clusters in a clustering result  $R$  to correspond to the clusters in a reference clustering result  $R^{ref}$  is done by following a min-min approach. Pairwise distances are calculated between every pair of clusters in those two clustering results. Then, the two clusters in the best matching pair (the one with the minimum distance) are mapped to each other. After that, these already-mapped clusters are eliminated from the matrix of pairwise distances allowing for the same step to be applied in the following iteration in order to select the second best matching pair. This iterative approach runs until all  $k$  clusters in  $R$  are mapped/aligned to the  $k$  clusters in  $R^{ref}$ .

In practice, as shown in Algorithm 3,  $FCR$  is initially assigned the values of the first clustering result  $R^1$ . Then, the second clustering result  $R^2$  is relabelled against this initial version of  $FCR$ , and is merged with it by an element-by-element averaging to form an updated  $FCR$ . This process iterates over all of the clustering results, one-by-one, to relabel each of them against the current version of  $FCR$  and to update  $FCR$  accordingly. In fact, the order in which these clustering results are taken affects the result of this algorithm, where those taken first influence the final result more. Therefore, the  $N_r$  clustering results  $\{R^1 \dots R^{N_r}\}$  are first reordered in an ascending order based on the average mean-squared error (MSE) values of their clusters. MSE values, as explained in the following section, evaluate the dispersion within clusters, and thus lower MSE values reflect tighter (better) clusters. This reordering of the clustering results guarantees that better results are merged earlier in  $FCR$  and are therefore more influential over the final result.

---

**Algorithm 3** Find the consensus of a set of partitions
 

---

```

1: procedure FINDCONSENSUS(R)
2:   ReorderMSE(R)
3:    $FCR = R^1$ 
4:   for  $r$  from 2 to  $N_r$  do
5:      $R^{r*} = \text{Relabel}(FCR, R^r)$ 
6:      $FCR = \frac{(r-1) \times FCR + R^{r*}}{r}$ 
7:   end for
8:   Return  $FCR$ 
9: end procedure
     $\triangleright$  R: set of clustering results with the same number of clusters ( $k$ )
     $\triangleright$  R:  $\{R^r \mid r \in 1:N_r; N_r: \text{number of clustering results in } \mathbf{R}\}$ 
     $\triangleright$   $R^r$ :  $r^{th}$  clustering result; ( $Ng$  genes  $\times$   $k$  clusters) matrix
     $\triangleright$   $R^r[g, s] \in [0, 1]$ : membership of the  $g^{th}$  gene in the  $s^{th}$  cluster in the  $r^{th}$  clustering result
     $\triangleright$   $R^{r*}$ : relabelled version of  $R^r$ ; ( $Ng$  genes  $\times$   $k$  clusters) matrix
     $\triangleright$  ReorderMSE: reorder  $\{R^1 \dots R^{N_r}\}$  in an ascending way based on their mean MSE values

10: procedure RELABEL( $R^{ref}$ ,  $R$ )
11:    $D = \text{pdist}(R^{ref}, R)$ 
12:    $max\_distance = \max(D)$ 
13:    $R^* = \text{emptymatrix}(Ng \times k)$ 
14:   for  $i$  from 1 to  $k$  do
15:      $(m, n) = \text{argmin}(D)$   $\triangleright$   $m$  &  $n$  are the row & the column of the minimum value in  $D$ 
16:      $R^*[n^{th} \text{ column}] = R[m^{th} \text{ column}]$ 
17:      $D[m^{th} \text{ row}] = max\_distance$ 
18:      $D[n^{th} \text{ column}] = max\_distance$ 
19:   end for
20:   Return  $R^*$ 
21: end procedure
     $\triangleright$   $R^{ref}$ : reference clustering result; ( $Ng$  genes  $\times$   $k$  clusters) matrix
     $\triangleright$   $R$ : clustering result to be relabelled based on  $R^{ref}$ ; ( $Ng$  genes  $\times$   $k$  clusters) matrix
     $\triangleright$   $R^*$ : relabelled version of  $R$ ; ( $Ng$  genes  $\times$   $k$  clusters) matrix
     $\triangleright$  pdist: function to find the pairwise distance between the columns of two matrices
     $\triangleright$   $D$ : ( $k \times k$ ) matrix of pairwise distances between the  $k$  clusters in  $R^{ref}$  and  $R$ 

```

---

### 1.3.2 The DTB binarisation algorithm

Algorithm 4 describes the DTB binarisation algorithm. This algorithm transforms every fuzzy membership value ( $\in [0.0, 1.0]$ ) in the fuzzy consensus result matrix ( $FCR$ ) into a binary membership value (either fully belongs (1) or does not belong at all (0)). The algorithm performs this in a gene-by-gene manner, where each gene is represented by a row in the  $FCR$  matrix. Given the fuzzy membership values of a given gene in all of the clusters, it is assigned to the cluster in which it has its highest fuzzy membership only if it is larger than its second highest membership with a difference of  $\delta$  or more. On the other hand, if the highest two membership values of that gene

are closer to each other than  $\delta$ , it is assumed that there is no sufficient evidence for this gene to be exclusively included in a particular cluster, and is therefore not assigned to any of the clusters. The parameter  $\delta \in [0.0, 1.0]$  is a tuning parameter which controls the strictness of binarisation. The tightest (most strict) results are obtained at  $\delta = 1.0$  where a gene is assigned to a cluster only if its fuzzy membership in it is 1.0 and is 0.0 in all other clusters. The least strict results are obtained at  $\delta = 0.0$  where every gene is assigned to the cluster in which it has its highest membership value regardless of its other membership values. In the latter case, ties may happen between clusters competing over a gene, the case in which a gene is assigned to all of these equally competing clusters in the binarised result.

---

**Algorithm 4** Difference threshold binarisation (DTB) algorithm
 

---

```

1: procedure BINARISE( $FCR, \delta$ )
2:    $BCR = \text{zerosmatrix}(Ng \times k)$  ▷ Initialise  $BCR$  with zeros
3:   for  $g$  from 1 to  $Ng$  do
4:      $top\_cluster\_index = \text{argmax}(FCR[g^{th} \text{ row}])$ 
5:      $top\_cluster\_membership = \text{max}(FCR[g^{th} \text{ row}])$ 
6:      $second\_top\_cluster\_membership = \text{secondmax}(FCR[g^{th} \text{ row}])$ 
7:     if  $(top\_cluster\_membership - second\_top\_cluster\_membership) \geq \delta$  then
8:        $BCR[g, top\_cluster\_index] = 1$ 
9:     else
10:      Skip to next gene ▷ Gene is not assigned to any cluster
11:     end if
12:   end for
13:   Return  $BCR$ 
14: end procedure

```

▷  $FCR$ : fuzzy consensus result; ( $Ng$  genes  $\times$   $k$  clusters) matrix  
 ▷  $BCR$ : binary consensus result; ( $Ng$  genes  $\times$   $k$  clusters) matrix

---

## 1.4 Elite seed cluster selection (The M-N scatter plots technique)

Algorithm 5 describes the M-N scatter plots technique which selects an elite set of non-overlapping clusters out of the large set of seed clusters generated by the Bi-CoPaM method under varying parameter values. Each seed cluster ( $s$ ) is evaluated using two metrics:

1.  $M_s^* \in [0.0, t]$ : measures the **dispersion** as a scaled value of the mean-squared error (MSE) of the genes in that cluster. In the case of multiple datasets, the MSE is first calculated for the cluster  $s$  based on each one of the  $L$  datasets ( $M_s^1 \dots M_s^L$ ). Then, the maximum of these values is considered as the representative MSE of the cluster ( $M_s$ ). As larger MSE values indicate higher dispersion, and therefore less tight clusters, considering the maximum in this case means that the quality of the cluster here is limited by its worst performance across the datasets. The final  $M_s^*$  values are calculated for all clusters after that by linearly transforming all  $M_s$  values to the range  $[0.0, t]$ . **Better clusters have smaller  $M_s^*$  values.**

2.  $N_s^* \in [0.0, 1.0]$ : measures the **size** of the cluster. This is the number of genes in the cluster after being transformed to the logarithmic scale first and then to the  $[0.0, 1.0]$  range. **Better clusters have larger  $N_s^*$  values.**

Better clusters are those with smaller dispersion while including more genes, and therefore are those which minimise  $M_s^*$  and maximise  $N_s^*$ . If all clusters are scattered as points on a 2D plot whose horizontal axis is  $M_s^*$  and whose vertical axis is  $N_s^*$ , better clusters will be those closer to the top left corner of the plot with the coordinates  $(0.0, 1.0)$ . So, the single-value metric which reflects the quality of a cluster  $s$  according to this algorithm is its distance from the top left corner of the M-N plot. This distance is called the M-N distance ( $MND_s$ ), and better clusters have smaller  $MND_s$  values.

Clearly, the M-N scatter plot has the shape of a  $(1.0 \times t)$  rectangle. Indeed, varying the parameter  $t$  changes the weight with which the horizontal dimension  $M_s^*$  affects the result compared with the vertical dimension  $N_s^*$ . Higher  $t$  values favour tighter (less dispersed) clusters while compensating the size of the cluster while smaller  $t$  values have an opposite effect. The default value of  $t$  is 1.0.

After finding the  $MND_s$  value for all clusters, the cluster with the smallest  $MND_s$  value is selected as the first and best elite seed cluster. After that, all of the seed clusters which have genes shared with that selected seed cluster are eliminated. The same steps are repeated over the remaining seed clusters. That is, to select the cluster with the minimum  $MND_s$  and then to eliminate the clusters that share genes with it. The process is repeated until no seed clusters remain. Each of these iterations identifies a single elite seed cluster. It can be clearly seen that this iterative process produces a list of elite seed clusters in order of quality. Finally, if any selected clusters are smaller than the pre-specified smallest cluster size ( $sc$ ), they are eliminated.

**Algorithm 5** M-N plots selection

---

```

1: procedure MN( $\mathbf{X}$ ,  $R^{seed}$ ,  $t=1.0$ ,  $sc=11$ )
2:   for each cluster  $s$  in  $R^{seed}$  do
3:     for each dataset  $X^l$  in  $\mathbf{X}$  do
4:        $M_s^l = \frac{1}{D_l \times N_s} \sum_{\mathbf{x}_g^l, \forall g \in C_s} \|\mathbf{x}_g^l - \mathbf{z}_s^l\|^2$ 
5:     end for
6:      $M_s = \max_{\forall l} (M_s^l)$ 
7:   end for
8:   for each cluster  $s$  in  $R^{seed}$  do
9:      $M_s^* = t \times \left( \frac{M_s - \min_{\forall s} (M_s)}{\max_{\forall s} (M_s) - \min_{\forall s} (M_s)} \right)$ 
10:     $N_s^* = \frac{\log(N_s)}{\max(\log(N_s))}$ 
11:   end for
12:    $MND_s = \sqrt{M_s^{*2} + (1 - N_s^*)^2}$ 
13:    $EliteClusters = ()$ 
14:    $RemainingSeedClusters = 1:\hat{k}$ 
15:    $i=1$ 
16:   while  $RemainingSeedClusters$  is not empty do
17:      $bestcluster = \arg \min_{\forall s \in RemainingSeedClusters} (MND_s)$ 
18:      $EliteClusters[i] = bestcluster$ 
19:      $Remove(RemainingSeedClusters, bestcluster)$ 
20:      $SimilarClusters = \{s | (cluster_s \cap cluster_{bestcluster}) \neq \emptyset\}$ 
21:      $Remove(RemainingSeedClusters, SimilarClusters)$ 
22:      $i = i + 1$ 
23:   end while
24:    $R^{elite} = R^{seed}[\text{columns: } EliteClusters]$ 
25:    $RemoveSmallClusters(R^{elite}, sc)$  ▷ Remove clusters with less than  $sc$  genes
26:   Return ( $R^{elite}$ ,  $MND$ )
27: end procedure

```

---

- ▷  $M_s^l$ : MSE value of the  $s^{th}$  cluster based on the  $l^{th}$  dataset
  - ▷  $M_s$ : Summarised MSE value of the  $s^{th}$  cluster based on all datasets
    - ▷  $M_s^* \in [0, t]$ : Scaled MSE value of the  $s^{th}$
    - ▷  $N_s$ : number of genes in the  $s^{th}$  cluster
    - ▷  $N_s^* \in [0, 1]$ : scaled log number of genes in the  $s^{th}$  cluster
    - ▷  $C_s \subset (1 : N_g)$ : set of indices of the genes in the  $s^{th}$  cluster
  - ▷  $\mathbf{x}_g^l$ : vector of gene expression values of the  $g^{th}$  gene in the  $l^{th}$  dataset
  - ▷  $\mathbf{z}_s^l$ : average gene expression values of the genes in the  $s^{th}$  cluster in the  $l^{th}$  dataset
-



## 1.5 Cluster optimisation and completion

This step of the *clust* aims at addressing some of the defects that can be found in the selected elite seed clusters (Algorithm 6). In particular, three issues are addressed by this algorithm:

1. False positives: These are genes that are included in clusters but they do not fit well within their profiles. For instance, outliers are among false-positives.
2. False negatives: These are genes which fit well within some cluster's profile but are not included in it.
3. Profiles' overlap: These are genes which fit well within the profiles of two or more clusters at the same time. In reality, each of these genes might be included in one or none of these clusters, but it fits within the other cluster(s).

Addressing these issues collectively is done by following this rationale:

1. The elite seed clusters are ordered based on their *MND* values. So split them into "good clusters" and the "rest of the clusters" by the "largest-weighted-gap" technique (described below).
2. From the "good clusters", empirically learn the accepted dispersion of gene expression values from their mean by using the "modified one-tailed Tukey's method" (described below).
3. Go back to all elite seed clusters and consider their average profiles as skeletons for the final optimised clusters.
4. Temporarily define the boundaries of the final clusters as their average profiles  $\pm$  the maximum accepted dispersion. These average profiles and accepted dispersion values have been empirically learnt in the steps above.
5. Update the boundaries of the final clusters by resolving any overlaps between any two defined cluster-boundaries by the algorithm described below.
6. Ignore the original assignment of genes to clusters, and freshly map all genes in the data that fully fit within any of the defined clusters' boundaries to them. This defines the final cluster membership.

As can be seen, this optimisation algorithm considers all of the previous steps that produced elite seed clusters as an exercise to empirically learn the shapes of the gene expression profiles that exist in the data as well as the acceptable dispersion around these shapes. Once such empirically derived cluster-boundaries are identified, genes are assigned to them.

It can also be seen that this approach takes care of the three aforementioned issues. False positives (outliers) will not be included in the final clusters because they will not fit within the boundaries that were learnt empirically. Importantly, the technique used to learn the maximum acceptable dispersion, and therefore the boundaries, is robust to outliers (see the modified one-tailed Tukey's method described below). As for false-negatives, the algorithm includes all genes

that fit well within the boundaries of the clusters in them by a brute force iteration over all genes. This guarantees that no gene which fits well within a cluster, compared to the other genes in that cluster, will be missed. Finally, the boundaries are guaranteed not to overlap by the overlap-resolving method described below, and this addresses the third issue.

---

**Algorithm 6** Cluster optimisation and completion
 

---

```

1: procedure OPTIMISE( $\mathbf{X}$ ,  $R^{elite}$ ,  $MND$ ,  $sc=11$ ,  $Q\beta s=2.0$ )
2:    $GoodClusters = LargestWeightedGap(MND)$ 
3:   for each dataset  $X^l$  in  $\mathbf{X}$  do
4:     for each gene  $g$  in  $1:Ng$  do
5:        $s =$  the cluster to which the gene  $g$  belongs
6:       if ( $s \in GoodClusters$ ) and ( $\mathbf{z}_s^l$  is not an all-zeros vector) then
7:          $\mathbf{e}_g^l = |\mathbf{x}_g^l - \mathbf{z}_s^l|$ , where gene  $g \in s^{th}$  cluster
8:       else
9:         Remove  $\mathbf{e}_g^l$  from  $E^l$ 
10:      end if
11:    end for
12:     $\mathbf{q}\mathbf{3}^l = Columnwise3rdQuartile(E^l)$ 
13:     $\mathbf{e}\mathbf{m}\mathbf{a}\mathbf{x}^l = Q\beta s \times \mathbf{q}\mathbf{3}^l$ 
14:    for each cluster  $s$  in  $1:k^{elite}$  do
15:       $\mathbf{l}\mathbf{o}\mathbf{w}\mathbf{e}\mathbf{r}_s^l = \mathbf{z}_s^l - \mathbf{e}\mathbf{m}\mathbf{a}\mathbf{x}^l$ 
16:       $\mathbf{u}\mathbf{p}\mathbf{p}\mathbf{e}\mathbf{r}_s^l = \mathbf{z}_s^l + \mathbf{e}\mathbf{m}\mathbf{a}\mathbf{x}^l$ 
17:    end for
18:    ( $\mathbf{L}\mathbf{o}\mathbf{w}\mathbf{e}\mathbf{r}$ ,  $\mathbf{U}\mathbf{p}\mathbf{p}\mathbf{e}\mathbf{r}$ ) = ResolveOverlaps( $\mathbf{L}\mathbf{o}\mathbf{w}\mathbf{e}\mathbf{r}$ ,  $\mathbf{U}\mathbf{p}\mathbf{p}\mathbf{e}\mathbf{r}$ )
19:     $R^{final} \equiv (Ng \times k^{elite})$  matrix;  $r_{g,s}^{final} = \begin{cases} 1, & lower_{s,d}^l \leq x_{g,d}^l \leq upper_{s,d}^l \forall l \forall d \\ 0, & \text{otherwise} \end{cases}$ 
20:    RemoveSmallClusters( $R^{final}$ ,  $sc$ ) ▷ Remove clusters with less than  $sc$  genes
21:    Return  $R^{final}$ 
22:  end procedure

```

▷  $R^{elite}$  are in an ascending order based on their M-N distances ( $MND$ )  
 ▷  $GoodClusters$ : a list of indices of the “good clusters”

---

### 1.5.1 Largest-weighted-gap technique

The elite seed clusters are ordered based on their  $MND$  values. So, the ordered  $MND$  values are used to split the clusters into “good clusters” and the “rest of the clusters”. The largest-weighted-gap technique calculates the gaps (the differences) between every two consecutive clusters’  $MND$  values. The gaps are then weighted such that the last gap, which is the one between the last and the next-to-last clusters, has zero weight, and the weights increase with natural numbers for earlier gaps. Then, the clusters before the largest weighted gap are defined as the “good clusters”.

---

**Algorithm 7** Finding “good clusters”: Largest-weighted-gap technique
 

---

```

1: procedure LARGESTWEIGHTEDGAP( $MND$ )
2:    $gaps = MND_{2:k^{elite}} - MND_{1:(k^{elite}-1)}$ 
3:    $wgaps = gaps \times ((k^{elite} - 1) : 1)$ 
4:    $GoodClusters = 1:\text{argmax}(wgaps)$ 
5:   Return  $GoodClusters$ 
6: end procedure

```

$\triangleright k^{elite}$ : number of elite clusters; this is equal to the length of  $MND$   
 $\triangleright MND_{a:b}$ : a subset of  $MND$  from the  $a^{th}$  element to the  $b^{th}$ , inclusively

---

### 1.5.2 Modified one-tailed Tukey’s method

This is a method to identify the maximum accepted dispersion of gene expression values from their average empirically based on the genes in the “good clusters”. This maximum dispersion is defined independently for each dimension (condition) in each dataset, and is calculated as the absolute difference from the mean at that dimension. Given the  $d^{th}$  condition in the  $l^{th}$  dataset, dispersion values  $e$  are calculated for all of the genes in all of the “good clusters”. The  $3^{rd}$  quartile of these  $e$  values is identified after that ( $q3$ ), and the maximum accepted dispersion is calculated as  $emax = Q3s \times q3$ , where  $Q3s$  is a used-defined parameter with the default value of 2.0.

The parameter  $Q3s > 0$  defines how many  $3^{rd}$  quartiles far from the mean are accepted. Thus, higher values of  $Q3s$  allow for less tight clusters to be formed, while smaller values force clusters to be tighter. All values beyond  $Q3s \times q3$  are considered as outliers.

Having calculated the maximum allowed dispersion values  $emax$  for each dimension ( $d$ ) in each dataset ( $l$ ), the upper and the lower boundaries of the clusters are defined as their average profiles  $\pm$  these  $emax$  values. Based on that, a gene is said to fit within a cluster’s profile if its expression values are between the upper and the lower boundaries of that cluster at every condition of every dataset. If it fails to fulfill this criterion even at a single condition, the gene is not said to fit within this cluster.

### 1.5.3 Resolve overlaps among clusters’ boundaries

The clusters’ upper and lower boundaries are investigated for any overlaps, which are then eliminated as shown in Algorithm 8. An overlap between two clusters exists if their boundaries are defined in way that makes it possible for some gene expression profile to fully fit within both of them. This only applies if the overlap appears across all of the conditions in all of the datasets.

The problem is resolved by eliminating the overlap between the two clusters at a single condition by redefining the boundaries of one of the two clusters therein. The condition (dimension) to be fixed in this case is the one with the smallest overlap because it will result in minimum interference. Moreover, as the clusters are ordered based on their original  $MND$  values, the cluster to be modified in this case is the cluster which is latter in order. This makes such interference has a smaller effect over better clusters. Finally, the boundary update is simply done by redefining the overlapping boundary at the chosen condition of the chosen cluster to be just outside the boundaries of the other cluster at that condition.

---

**Algorithm 8** Resolve overlaps between clusters' boundaries
 

---

```

1: procedure RESOLVEOVERLAPS(Lower, Upper)
2:   for  $s_1$  in  $1:k^{elite}$  do
3:     for  $s_2$  in  $1:k^{elite}$  do
4:       if  $s_1 \geq s_2$  then Skip to next iteration end if
5:        $v_{ov} = 0$  ▷ Value of the smallest overlap
6:        $l_{ov} = -1$  ▷ Dataset of the smallest overlap
7:        $d_{ov} = -1$  ▷ Dimension of the smallest overlap
8:        $t_{ov} = -1$  ▷ Type of the smallest overlap  $\in \{-1, 0, 1, 2\}$ 
9:       for  $l$  in  $1:L$  do
10:        for  $d$  in  $1:D_l$  do
11:          if ( $upper_{s_1,d}^l > lower_{s_2,d}^l$  and  $upper_{s_1,d}^l \leq upper_{s_2,d}^l$ ) then
12:            if  $lower_{s_1,d}^l < lower_{s_2,d}^l$  then
13:               $ov = upper_{s_1,d}^l - lower_{s_2,d}^l$ 
14:              if ( $t_{ov} == -1$  or  $ov < v_{ov}$ ) then
15:                 $t_{ov} = 0$ 
16:                 $v_{ov} = ov$ 
17:                 $l_{ov} = l$ 
18:                 $d_{ov} = d$ 
19:              end if
20:            end if
21:          else if ( $upper_{s_2,d}^l > lower_{s_1,d}^l$  and  $upper_{s_2,d}^l \leq upper_{s_1,d}^l$ ) then
22:            if  $lower_{s_2,d}^l < lower_{s_1,d}^l$  then
23:               $ov = upper_{s_2,d}^l - lower_{s_1,d}^l$ 
24:              if ( $t_{ov} == -1$  or  $ov < v_{ov}$ ) then
25:                 $t_{ov} = 1$ 
26:                 $v_{ov} = ov$ 
27:                 $l_{ov} = l$ 
28:                 $d_{ov} = d$ 
29:              end if
30:            end if
31:          else  $t_{ov} = 2$ ; Skip to next iteration
32:          end if
33:        end for
34:        if ( $t_{ov} == 2$ ) then Skip to next iteration end if
35:      end for
36:      if ( $t_{ov} == -1$ ) then  $lower_{s_2,0}^0 = 1$ ;  $upper_{s_2,0}^0 = 0$ 
37:      else if ( $t_{ov} == 0$ ) then  $lower_{s_2,d_{ov}}^{l_{ov}} = upper_{s_1,d_{ov}}^{l_{ov}} + \epsilon$ 
38:      else if ( $t_{ov} == 1$ ) then  $upper_{s_2,d_{ov}}^{l_{ov}} = lower_{s_1,d_{ov}}^{l_{ov}} - \epsilon$ 
39:      end if
40:    end for
41:  end for
42:  Return (Lower, Upper)
43: end procedure

```

---
