# Supplementary material for: Clust: automatic extraction of optimal co-expressed gene clusters from gene expression data
Source: Genome Biol. 2018 Oct 25;19:172. doi: 10.1186/s13059-018-1536-8 (PMC6203272; doi:10.1186/s13059-018-1536-8)
Supplement: Supplementary file 9 — Table S7. Values of each one of the seven cluster validation indices DB, BIC, Silhouette, CH, BH, XU, and WB, and the rank scores, when calculated for the results of applying each one of the eight clustering methods to each of the 100 datasets. (XLSX 60 kb) [file 13059_2018_1536_MOESM9_ESM.xlsx]

## Sheet: A
Dataset				Average rank								DB								BIC								Silhouette								CH								BH
ID	Species	Dims	Ng	Clust	CC	K-means	SOMs	HC-avg	MCL	Click	WGCNA	Clust	CC	K-means	SOMs	HC-avg	MCL	Click	WGCNA	Clust	CC	K-means	SOMs	HC-avg	MCL	Click	WGCNA	Clust	CC	K-means	SOMs	HC-avg	MCL	Click	WGCNA	Clust	CC	K-means	SOMs	HC-avg	MCL	Click	WGCNA	Clust	CC	K-means	SOMs	HC-avg	MCL
D001	Homo sapiens	10	50082	2.14	7.5	3.29	3.14	7.5	4.43	3.86	4.14	0.85	NaN	0.87	0.91	NaN	0.91	0.99	1.05	-227226	NaN	-711018	-684565	NaN	-712515	-693628	-842507	0.11	NaN	0.08	0.09	NaN	-0.12	0.07	-0.04	5229.86	NaN	1637.33	2336.57	NaN	268.12	1833.43	286.84	5716.78	NaN	4401.35	9443.96	NaN	942.64
D002	Homo sapiens	10	27256	2	2.71	4	5.57	5	5.71	5	6	0.54	0.47	0.6	0.8	0.66	0.86	0.79	0.96	-124989	-226622	-307621	-310776	-308286	-338928	-334029	-361289	0.27	0.44	0.35	0.12	0.32	0.14	0.16	0.07	20524.8	26844.5	17167.6	4656.05	14341	974.1	4294.1	1463.45	1266.11	49196.2	83299.5	32260.5	88960.3	1476.92
D003	Homo sapiens	21	17025	2.14	2.86	4.14	5.57	5.43	4.14	5.29	6.43	0.82	0.78	0.88	1.16	0.99	0.97	1.14	1.46	-76726.7	-289928	-372454	-382654	-372907	-166545	-373820	-420041	0.2	0.24	0.22	0.14	0.19	0.03	0.07	0	5588.62	6126.72	5312.58	2748.3	4158.56	404.83	787.09	231.26	2091.98	101519	136074	60138.9	143487	419.9
D004	Homo sapiens	6	39505	3	4.29	3.43	3.86	5.57	5.14	5.29	5.43	0.72	0.93	0.6	0.63	0.77	0.85	0.78	0.73	-139962	-165319	-394479	-386428	-395389	-320731	-382155	-423691	0.19	0.21	0.17	0.16	0.05	0.07	0.08	0.05	10116.3	12236.7	3189.03	3478.42	2113.93	4657.45	2767.92	1536.45	4146.42	46807.6	1027.62	1609.71	1305.81	24818
D005	Homo sapiens	4	39767	1.14	3.29	3.14	4.57	5.14	6	8	4.71	0.22	0.4	0.37	0.42	0.43	0.57	NaN	0.44	-121661	-159731	-262658	-225209	-252325	-240091	NaN	-254510	0.71	0.5	0.43	0.42	0.34	0.32	NaN	0.37	109706	42260.8	27644.6	28741	19977.4	19484.9	NaN	20852.7	83.27	4086.98	147.78	12479.7	920.67	3571.41
D006	Homo sapiens	8	44337	2.29	4.71	4.71	4.29	5.71	4.71	3.57	6	0.57	0.95	0.74	0.77	0.9	0.9	0.81	1.02	-182066	-225384	-516653	-444104	-510733	-508875	-316111	-565103	0.21	0.2	0.14	0.2	0.06	0.06	0.19	0	8919.74	12074.5	3372.2	9977.52	1319.11	1319.13	12587.7	643.15	1313.29	70408.4	3478.25	52834.7	2878.89	2080.9
D007	Homo sapiens	4	54475	1.43	7.5	2.29	4.71	7.5	5.43	4	3.14	0.36	NaN	0.39	0.59	NaN	0.61	0.51	0.46	-182485	NaN	-389155	-344682	NaN	-332513	-356397	-369446	0.44	NaN	0.32	0.19	NaN	0.13	0.23	0.24	40471.8	NaN	26998	15961.5	NaN	15592.5	19927.4	21216.5	528.92	NaN	177.69	4996.05	NaN	8988.91
D008	Homo sapiens	36	44214	1.86	3.29	4.71	6.86	6.29	3.29	3.43	6.29	0.63	0.98	1.3	1.4	1.75	1.03	1.09	1.86	-210213	-805907	-1.60767e+06	-1.57432e+06	-1.59204e+06	-603385	-617535	-1.737e+06	0.24	0.15	0.09	0.03	0.07	0.09	0.09	-0.02	18237.8	8765.42	4374.13	1488.55	3439.71	2169.98	3464.44	155.48	6333.86	333854	442576	769236	737823	3421.01
D009	Homo sapiens	8	43077	2.43	4.86	3.29	4.29	5.57	6.14	4	5.43	0.76	1.23	0.76	0.8	0.99	0.92	0.82	0.87	-186385	-190458	-526369	-526740	-518899	-480261	-508145	-659954	0.15	0.06	0.11	0.1	0.01	-0.06	0.11	-0.01	4644.82	4966.38	1721.15	1667.2	1045.55	902.22	1999.81	372.39	2779.39	39754.9	2406.8	2457.46	3244.13	4736.63
D010	Homo sapiens	4	24254	1.57	4.57	2.57	6	4.43	5.14	8	3.71	0.4	0.65	0.39	0.59	0.47	0.49	NaN	0.47	-51529.5	-91101.6	-170271	-146320	-164848	-148366	NaN	-165107	0.34	0.34	0.33	0.12	0.23	0.2	NaN	0.25	13417.9	14226.7	12118.5	6692.42	9306.66	9287.02	NaN	9594.82	133.92	20121.5	130.77	5215.97	410.88	3292.97
D011	Homo sapiens	8	18002	2.71	3.14	3.86	4.29	5.57	6.14	5.14	5.14	0.72	0.67	0.7	0.78	0.8	0.87	0.84	0.91	-81690.3	-97950.3	-215064	-189512	-202384	-186993	-196920	-214398	0.15	0.27	0.14	0.17	0.05	0.02	0.1	0.05	3952.29	7072.3	1378.34	3498.36	772.22	551.63	1845.15	876	750.9	14221.4	646.62	7569.66	1138.36	2178.93
D012	Homo sapiens	4	18780	1.71	3.57	3	6	4.43	6.29	5.29	5.71	0.35	0.38	0.38	0.55	0.44	0.51	0.55	0.47	-71280.2	-80586.5	-119161	-114261	-112917	-95098.8	-105295	-110268	0.46	0.51	0.38	0.29	0.31	0.26	0.29	0.28	23994.5	26455.3	12087.8	8356.19	8000.34	8605.96	9277.61	6848.94	163.81	11710.2	87.89	1408.08	295.25	7422.22
D013	Homo sapiens	5	14980	2.86	2.86	3.86	4.43	5.57	6.14	4.29	6	0.52	0.43	0.51	0.58	0.6	0.74	0.61	0.64	-64007.6	-62624.6	-127154	-116389	-117727	-98201.1	-98556.9	-123812	0.26	0.49	0.22	0.22	0.15	0.2	0.27	0.12	8476.47	18125	2926.03	3847.29	2287.68	3732.01	6624.8	1858.15	478.16	10653.2	172.11	958.9	594.01	10659
D014	Homo sapiens	4	80007	1.14	7.5	2.29	4.29	7.5	5.14	4.43	3.71	0.25	NaN	0.35	0.41	NaN	0.5	0.46	0.45	-178322	NaN	-462279	-464799	NaN	-425954	-426187	-442150	0.66	NaN	0.49	0.46	NaN	0.25	0.3	0.39	185800	NaN	60962.6	53410.4	NaN	33903.5	35169.3	35427.9	146.68	NaN	400.63	6118	NaN	3504.33
D015	Homo sapiens	5	16574	2.14	3.43	3.86	4.14	5.57	5.14	5.57	6.14	0.53	0.52	0.51	0.55	0.59	0.58	0.65	0.61	-49031.3	-85249.9	-141095	-127804	-127292	-117346	-126364	-133521	0.27	0.42	0.23	0.24	0.13	0.21	0.2	0.11	11253.6	13988.5	3299.74	4612.35	2284.69	3890.53	3697.11	2069.67	310.24	17815.6	165.85	1124.83	825.01	3908.33
D016	Homo sapiens	6	26618	1.86	8	3.14	3.86	4.57	5.57	4.29	4.71	0.47	NaN	0.57	0.59	0.33	0.79	0.69	0.72	-121198	NaN	-238236	-237267	-184141	-222094	-241529	-254055	0.34	NaN	0.24	0.24	0.57	0.11	0.18	0.14	10447	NaN	5159.66	4887.04	368.82	2780.39	3721.25	2388.38	1084.82	NaN	2308.73	2680.19	79399.8	7159.53
D017	Homo sapiens	15	33081	2	4.14	4.14	4.57	5.14	4.29	5.57	6.14	0.72	1.02	0.96	1.01	1.14	0.9	1.14	1.26	-116800	-317475	-608938	-610255	-604397	-442597	-599441	-640507	0.22	0.15	0.11	0.1	0.01	0	0.06	0	5880.12	5843.31	1614.1	1534.99	495.7	296.73	1283.09	479.75	2257.89	68227.6	9674.49	9325.2	6020.53	546.16
D018	Homo sapiens	6	10757	2.43	2.14	3.29	5.29	4.29	5	8	5.57	0.34	0.24	0.29	0.3	0.3	0.52	NaN	0.59	-43780.3	-56219.7	-75673.3	-75898.1	-75836.4	-78414.6	NaN	-80757.5	0.36	0.67	0.61	0.6	0.6	0.48	NaN	0.26	28500.1	33702.8	22754.1	21358.6	21753.8	7420.49	NaN	3956.15	117.63	5693.25	10351.1	10800.9	10669.6	1785.41
D019	Homo sapiens	4	16559	1.43	2.43	7	7	7	4.14	3.29	3.71	0.39	0.44	NaN	NaN	NaN	0.58	0.53	0.49	-70137.4	-47522.5	NaN	NaN	NaN	-84350.1	-92580.5	-98061.8	0.36	0.49	NaN	NaN	NaN	0.25	0.27	0.23	9781.62	18171	NaN	NaN	NaN	5837.3	6272.62	5666.41	153.38	7497.94	NaN	NaN	NaN	6726.06
D020	Homo sapiens	12	20287	1.43	3.14	4.14	5	5.29	5.71	5.14	6.14	0.52	0.68	0.62	0.71	0.68	0.86	0.76	0.98	-99971.4	-180805	-268285	-278460	-268840	-291111	-275572	-304601	0.36	0.34	0.34	0.26	0.3	0.13	0.23	0.1	11997.9	12989.1	11903.8	8205.1	9668.51	719.83	7186.36	1317.61	590.39	23130.4	76507.9	27422.6	82217.4	1087.59
D021	Mus musculus	6	40808	2.14	3	3.43	3.86	7.5	4	7.5	4.57	0.59	0.65	0.67	0.72	NaN	0.95	NaN	1.1	-176166	-207250	-401747	-404159	NaN	-355990	NaN	-451577	0.16	0.4	0.1	0.09	NaN	0.04	NaN	-0.05	3690.45	4157.32	1952.55	1860.98	NaN	2940.32	NaN	608.85	2230.82	52896.4	1574.79	1571.59	NaN	14908
D022	Mus musculus	4	35967	2.14	3	2.86	4.43	4.43	6	8	5.14	0.38	0.44	0.39	0.47	0.45	0.62	NaN	0.48	-173236	-123563	-253560	-221323	-249981	-195102	NaN	-241298	0.36	0.47	0.32	0.31	0.24	0.24	NaN	0.23	24170.5	41675.2	19086.6	18252.8	13940.5	13332.8	NaN	14030.2	419.04	20514.6	125.52	3948.76	222.89	27531.7
D023	Mus musculus	8	20549	2.43	2.29	3.71	5.71	5.14	5.14	5.57	6	0.65	0.59	0.78	0.89	0.87	0.87	0.91	0.97	-80588.5	-126444	-193502	-192273	-194067	-222876	-232704	-259690	0.23	0.35	0.26	0.19	0.22	0.02	0.1	0.02	6543.48	12033.7	8129.83	5048.58	6381.04	592.5	1408.89	458.5	1074.92	32804	58712.3	65780.3	62525.3	1657.93
D024	Mus musculus	12	31474	2.86	2.29	3.71	3.57	7.5	4.14	7.5	4.43	0.44	0.39	0.53	0.23	NaN	1.08	NaN	1.41	-227697	-356117	-396495	-384500	NaN	-390100	NaN	-466753	0.33	0.48	0.35	0.66	NaN	-0.21	NaN	-0.17	8024.97	13169.9	13014.4	3988.86	NaN	123.4	NaN	280.74	3059.93	29693.9	44732.4	56117.7	NaN	263.92
D025	Mus musculus	6	37087	2.57	3.71	3.86	4.86	5.29	4.57	5.29	5.86	0.57	0.69	0.61	0.65	0.72	0.7	0.75	0.74	-131378	-169274	-357483	-356607	-354215	-313562	-338138	-376677	0.26	0.3	0.18	0.17	0.08	0.17	0.14	0.04	18471.5	18747.6	4060.56	3926.58	2280.8	6195.95	4225.59	1571.1	1588.62	42857.6	1213.34	1309.61	1279.96	10556.5
D026	Mus musculus	5	27198	2.29	4.29	3.29	4.14	5.86	4.43	5.71	6	0.52	0.7	0.51	0.54	0.62	0.61	0.65	0.65	-78603.7	-100223	-233819	-234956	-230391	-199734	-215343	-232661	0.28	0.31	0.22	0.21	0.12	0.21	0.15	0.12	9909.37	14355.6	4564.99	4338.16	3047.02	6102.82	4460.99	3035.75	371.51	23023.1	344.08	331.88	487.16	5388.3
D027	Mus musculus	4	40690	2.14	3.29	2.57	5.71	3.71	6	8	4.57	0.41	0.45	0.39	0.68	0.46	0.66	NaN	0.52	-165146	-164144	-288623	-257112	-291570	-229304	NaN	-270823	0.36	0.4	0.32	0.13	0.25	0.15	NaN	0.22	33164.6	30140.6	20671.5	12978.5	16135.6	10505.3	NaN	14649.9	717.99	15124.5	148.02	3528.41	159.03	22912.4
D028	Mus musculus	10	34497	2	3.43	5	5	5.57	4.71	4.43	5.86	0.63	0.91	0.89	0.94	1.09	0.88	0.97	1.17	-114636	-188403	-486644	-468014	-404647	-422991	-369772	-533446	0.26	0.23	0.08	0.09	0.11	-0.11	0.14	-0.04	9770.56	10927.5	1256.18	1815.4	4472	134.88	6385.88	229.36	2063.56	30749.3	2833.18	6080.97	91101.3	331.14
D029	Mus musculus	10	33332	2.86	2.43	3.86	4.86	5.86	5.71	4.43	6	0.5	0.35	0.44	0.46	0.46	0.92	0.58	1.17	-182060	-258180	-372110	-372517	-372798	-396442	-356753	-412012	0.27	0.55	0.46	0.44	0.44	0.11	0.4	0.14	44940.2	58215.9	35759.8	33314	32809	454.55	28541.4	1799.72	1420.55	42129	79978.3	82913.5	83546.6	445.86
D030	Mus musculus	4	32658	1.86	3.14	3.14	5.57	4.43	6.14	6.29	5.43	0.38	0.45	0.39	0.53	0.47	0.65	0.49	0.49	-121713	-136844	-228846	-188172	-231431	-173568	-212286	-218496	0.37	0.39	0.32	0.32	0.24	0.33	0.21	0.21	29820.2	22460.2	17053.3	16293.6	12815.8	16211	11590.2	12386.1	485.02	4835	138.31	13049.4	139.45	43548.8
D031	Mus musculus	4	24975	1.29	4.71	3.29	6.86	5	5.43	4	5.43	0.25	0.45	0.37	0.54	0.42	0.43	0.44	0.42	-49719.1	-108746	-146625	-132497	-141872	-130604	-117273	-137577	0.67	0.46	0.42	0.37	0.4	0.39	0.41	0.39	72929.4	27162.5	17921	14784.2	12155.5	14334.9	23903.7	13141.7	63.36	17242.2	214.69	13777.4	334.96	2900.97
D032	Mus musculus	20	29562	2.14	3.71	4.43	4.71	5.71	4.14	5.14	6	0.69	0.87	1.07	1.11	1.3	0.88	1.25	1.38	-107918	-347225	-702216	-696805	-678325	-392284	-665305	-713592	0.27	0.2	0.08	0.07	0.02	0.07	0.04	0	9019.83	8196.54	734.86	819.46	301.98	288.48	820.39	292.18	3800.71	126644	6387.89	8199.95	7962.17	369.77
D033	Mus musculus	5	12806	2.14	3.43	3.29	5.86	4.71	5.29	5.57	5.71	0.52	0.55	0.49	0.7	0.59	0.72	0.64	0.61	-37478.6	-52393.5	-109715	-94803.7	-108116	-91273.4	-102060	-108379	0.34	0.33	0.26	0.13	0.17	0.2	0.15	0.15	7562.27	5018.76	2360.56	2383.55	1651.56	2961.46	2055.2	1633.79	306.58	1446.35	148.37	2376.65	220.34	4918.05
D034	Mus musculus	4	24292	1.14	3.57	7	7	7	4.29	3	3	0.4	0.61	NaN	NaN	NaN	0.56	0.5	0.48	-68413.3	-93267.9	NaN	NaN	NaN	-133760	-146993	-155120	0.37	0.36	NaN	NaN	NaN	0.23	0.27	0.23	18834.5	13696.5	NaN	NaN	NaN	8289.88	9675.62	8886.61	333.47	20825.7	NaN	NaN	NaN	7463.63
D035	Mus musculus	4	21464	1.43	3.57	7	7	7	3.86	3.14	3	0.4	0.65	NaN	NaN	NaN	0.5	0.56	0.5	-77928.9	-69242.4	NaN	NaN	NaN	-112918	-110535	-127489	0.4	0.35	NaN	NaN	NaN	0.28	0.28	0.25	14290.6	12452.9	NaN	NaN	NaN	8011.61	8232.76	7517.28	359.79	14590.6	NaN	NaN	NaN	4005.04
D036	Mus musculus	6	20619	1.57	3.57	3.57	3.86	8	5.14	4.71	5.57	0.48	0.58	0.58	0.6	NaN	0.64	0.66	0.79	-89084.6	-98253.2	-196025	-161886	NaN	-168450	-175690	-185058	0.3	0.32	0.21	0.28	NaN	0.2	0.19	0.12	11111.2	10290.1	3236.33	9507.76	NaN	2914.41	4750.44	2319.01	534.39	24912.6	376.01	12898.2	NaN	4009.88
D037	Mus musculus	4	30406	1.29	2.86	7	7	7	3.86	3.57	3.43	0.39	0.45	NaN	NaN	NaN	0.56	0.47	0.44	-105731	-108414	NaN	NaN	NaN	-150962	-169380	-182048	0.42	0.47	NaN	NaN	NaN	0.33	0.31	0.28	27067.1	26505.7	NaN	NaN	NaN	14278.9	14023	12264.5	389.04	19643.1	NaN	NaN	NaN	17873.9
D038	Mus musculus	4	19491	1.86	3	3.43	5	4.71	6.86	5.43	5.71	0.35	0.35	0.38	0.48	0.43	0.55	0.49	0.47	-66179.7	-76339.3	-129669	-109713	-122454	-106898	-114530	-119847	0.44	0.54	0.35	0.37	0.3	0.22	0.3	0.27	18939.5	28447.2	12073.5	13571.7	8655.86	6407.92	11119.7	7871.34	116.2	4560.63	67.04	6027.33	236.42	4692.17
D039	Mus musculus	4	38945	1	2.86	3.29	7.14	4.57	6.86	5.71	4.57	0	0.31	0.37	0.57	0.42	0.6	0.49	0.42	65406.5	-127849	-229786	-236837	-221640	-206630	-205557	-216134	1	0.62	0.49	0.26	0.41	0.25	0.3	0.41	1.51e+32	42636	26297.7	11432.5	16733.9	16729.2	19050.6	18040	0	895.74	90.11	3007.9	252.15	3254
D040	Mus musculus	4	17909	1.43	4.29	2.86	5.57	5	5.57	5.43	5.86	0.36	0.5	0.39	0.58	0.44	0.54	0.48	0.46	-64372.8	-69813.6	-119688	-102916	-112078	-94133.5	-108421	-111408	0.45	0.44	0.37	0.31	0.29	0.31	0.27	0.28	15692.8	16898.6	9739.77	9233.77	6931.92	9544.45	8109.54	6291.17	107.21	12865.4	52.57	6595.53	306.69	10839
D041	D. melanogaster	19	45209	3	4	4.14	4.57	4.86	4.86	5	5.57	0.65	0.59	0.72	0.34	0.27	1.11	1.21	1.36	-219391	-797636	-881594	-844205	-844061	-644471	-880794	-985412	0.18	0.3	0.23	0.58	0.6	-0.15	-0.03	-0.12	4117.39	10338.1	10274.7	727.46	491.53	222.84	3178.77	538.05	656.75	65871.9	27520.9	59791.3	60402.1	227.05
D042	D. melanogaster	10	16490	1.86	3	4	4.86	6	5.71	4.43	6.14	0.42	0.5	0.53	0.53	0.57	0.72	0.59	0.84	-69053.8	-150485	-184374	-184198	-184936	-197208	-104199	-207611	0.34	0.45	0.41	0.4	0.38	0.2	0.31	0.16	18941.7	11665.6	12581.3	11524	10924.4	1014.33	10773.2	2123.34	479.4	16435	43914	45571.6	46568.4	1345.67
D043	D. melanogaster	6	34562	2.14	3	4	4.43	5.29	5.43	5.71	6	0.54	0.46	0.58	0.64	0.66	0.72	0.73	0.74	-118539	-186816	-262737	-270562	-255324	-276011	-276801	-317415	0.26	0.46	0.33	0.28	0.33	0.2	0.18	0.08	29781.2	36752.8	19257	17407.8	18283.8	5023.02	12418.6	1982.77	936.15	35505	32542.2	20550.7	67501.6	7647.73
D044	D. melanogaster	4	15537	2	3.43	2.71	5.71	4.43	5.43	8	4.29	0.4	0.47	0.39	0.53	0.44	0.53	NaN	0.45	-49782.2	-63752.6	-109312	-92649.4	-107191	-84916.8	NaN	-101312	0.35	0.42	0.32	0.26	0.26	0.32	NaN	0.26	15543.1	14833.8	8833.14	6975.95	6704.89	8444.13	NaN	7087.48	138.85	2780.25	42.81	2395.57	75.15	9895.96
D045	D. melanogaster	5	15476	1.86	4.43	4	4.14	5.43	5	5.57	5.57	0.54	0.71	0.51	0.6	0.62	0.67	0.66	0.64	-35860.3	-64551.8	-131372	-116229	-132412	-108911	-123343	-133646	0.36	0.3	0.23	0.23	0.13	0.23	0.14	0.12	7794.53	8084.84	2712.6	3869.53	1865.12	4165.59	2403.47	1754.79	281.48	15342.7	284.96	2859.06	295.61	7436.81
D046	D. melanogaster	9	14753	2.29	3.14	4	4.29	5.57	5.43	5.29	6	0.64	0.77	0.78	0.82	0.93	0.87	0.95	1.05	-54311.9	-101068	-158264	-161618	-170695	-174689	-178469	-193394	0.18	0.26	0.21	0.18	0.05	-0.02	0.09	0.03	3424.32	6899.82	4236.96	3626.57	618.01	195.33	766.1	402.65	425.21	26910.3	27666.2	18801.4	3383.85	508.84
D047	D. melanogaster	4	27547	2.43	2.86	4	4.71	5.86	5.71	4.14	6.29	0.19	0.14	0.18	0.19	0.19	0.39	0.52	0.43	-73947.7	-117555	-129618	-129281	-129729	-130310	-116905	-133769	0.53	0.8	0.74	0.73	0.73	0.65	0.34	0.53	335037	167671	108271	100144	99305.8	44153.8	99175.7	22251.3	48.71	6818.22	10588.9	11262.9	11337.4	1404.71
D048	D. melanogaster	4	13274	2.29	2.86	3.57	4.71	5.57	5.14	5.71	6.14	0.39	0.29	0.39	0.44	0.45	0.41	0.53	0.49	-53229.9	-52399.9	-90196.7	-68966.8	-79285.4	-72877.9	-80522.1	-82649.8	0.37	0.62	0.32	0.48	0.24	0.34	0.28	0.19	19113.8	29970.4	8416.43	14265.7	5360.45	6622.73	7329.52	4393.85	258.97	6069.67	48.84	12758.2	529.96	2524.17
D049	D. melanogaster	11	22233	3	2.86	3.86	4.29	3.71	5	8	5.29	0.43	0.39	0.46	0.43	0.34	1.16	NaN	1.4	-155166	-193064	-259068	-250924	-247929	-265687	NaN	-299097	0.33	0.48	0.38	0.47	0.56	-0.28	NaN	-0.19	6182.92	10423.7	8638.75	3984.96	1083.27	126.78	NaN	691.74	413.58	7982.72	7337.31	10318.7	10568.4	255.15
D050	D. melanogaster	4	14769	1.43	4.43	2.71	5	3.71	6.14	8	4.57	0.36	0.59	0.39	0.53	0.46	0.67	NaN	0.5	-47771.4	-53181.8	-104874	-86511.2	-100036	-82995	NaN	-99908.7	0.42	0.38	0.32	0.26	0.25	0.18	NaN	0.22	10475.9	10060.8	7370.56	5437.7	5836.33	3620.81	NaN	5451.93	108.88	10667.7	53.31	4665.67	237.93	8310.29
D051	D. melanogaster	4	15186	1.71	3.57	3.29	4.43	5	5.71	5.86	6.43	0.35	0.4	0.39	0.45	0.44	0.5	0.48	0.49	-46553.7	-49845.2	-106316	-93640.1	-103605	-88108.5	-95537.6	-98600.4	0.48	0.52	0.34	0.34	0.27	0.32	0.26	0.26	15601	20244.3	8489.7	8907.64	6367.3	7783.77	6569.12	6082.35	66.17	7448.43	44.16	1178.61	101.22	3960.28
D052	D. melanogaster	4	12273	3.14	2.57	3.29	5.43	5.14	5.57	4.43	6.43	0.43	0.38	0.39	0.46	0.45	0.54	0.45	0.48	-58475.9	-48756.3	-86245.1	-75751.9	-86151.2	-70368.7	-56060.3	-79284.9	0.31	0.5	0.33	0.31	0.26	0.33	0.4	0.23	9049.25	14374.2	6833.28	6738.47	5134.11	7158.93	9977.04	4360.86	147.62	3410.19	35.91	1008.6	45.39	4451.76
D053	D. melanogaster	7	13222	2.71	3	4.29	4.57	4.57	6	5	5.86	0.64	0.59	0.67	0.74	0.74	0.79	0.79	0.84	-51410.9	-87317.7	-143919	-139824	-110787	-121758	-130756	-139243	0.16	0.37	0.15	0.14	0.28	0.08	0.12	0.05	6327.74	8639.55	1156.65	1276.61	5138.47	835.84	1314.75	584.29	672.12	20788	353.96	602.09	32564	2640.04
D054	D. melanogaster	6	11797	1.57	3.14	4.14	4.86	5.43	5.71	5.29	5.86	0.46	0.49	0.48	0.58	0.59	0.61	0.66	0.71	-63951	-56609	-94912.6	-90166.7	-103170	-95624.9	-100165	-101550	0.37	0.39	0.34	0.33	0.19	0.29	0.22	0.18	8855.37	8217.78	5841.66	5929.56	1554.46	2550.94	2857.07	2794.9	343.4	3342.17	3375.16	11701.6	328.55	1734.87
D055	D. melanogaster	4	12803	2.14	2.57	2.86	4.86	4.14	6.43	8	5	0.39	0.4	0.39	0.55	0.47	0.77	NaN	0.48	-57662.9	-50950.7	-90584.9	-73678.7	-89240.3	-69052.7	NaN	-85136.5	0.38	0.4	0.32	0.31	0.24	0.17	NaN	0.23	9941.73	10004.5	6921.18	6650.06	5009.53	3798.93	NaN	4844.41	172.57	267.99	38.4	4972.48	64.68	10645.4
D056	D. melanogaster	4	12006	1.43	3.29	2.86	5.29	4.71	4.71	8	5.71	0.32	0.42	0.4	0.51	0.46	0.48	NaN	0.48	-34687.6	-48185.8	-81127.2	-69247.7	-74387.5	-66411.5	NaN	-73179.5	0.46	0.54	0.33	0.28	0.24	0.32	NaN	0.22	28792.8	17909.6	7542.38	5394.69	4953.75	6080	NaN	4168.87	56.66	2886.47	51.35	1833.41	328.52	3135.92
D057	D. melanogaster	10	11714	2.57	4	3.86	4.57	5.71	3.71	5.29	6.29	0.77	0.96	0.87	0.94	1.03	0.82	0.98	1.09	-42183.5	-85531.9	-166829	-159386	-162119	-134489	-158796	-182136	0.21	0.19	0.1	0.1	0.02	0.06	0.05	0.02	2806.74	3018.75	395.81	548.62	246.09	173.93	363.52	147.6	1457.38	28498.5	901.37	2184	1293.12	177.64
D058	D. melanogaster	8	13457	1.71	3.86	3.57	4.29	5.14	5.71	5.57	6.14	0.63	0.79	0.73	0.77	0.8	0.88	0.85	0.99	-67858.9	-90785.6	-126454	-141205	-136173	-143105	-146066	-151241	0.24	0.27	0.28	0.2	0.15	0	0.14	0.08	3589.19	5664.02	5862.3	2492.45	1665.29	285.32	1254.51	1038.68	443.2	26377.9	37333.8	4797.62	7178.22	1041.29
D059	D. melanogaster	8	12719	2.57	3.14	3.29	4.29	8	4.86	4.71	5.14	0.66	0.75	0.75	0.82	NaN	0.84	0.91	0.93	-44353.7	-79257	-154236	-154374	NaN	-145930	-143488	-169179	0.22	0.27	0.12	0.11	NaN	0.01	0.08	0.03	4379.07	5622.76	648.79	596.44	NaN	304.91	609.55	249.96	1168.67	22162.5	621.66	636.42	NaN	695.6
D060	D. (4 species)	12	5104	1.43	3.43	4	5.43	5.43	5	5.14	6.14	0.49	0.54	0.77	0.98	0.85	0.8	0.84	1.06	-19312.6	-35751.7	-71678.5	-70059.2	-76071.2	-73452	-76704.4	-78769.8	0.4	0.38	0.19	0.12	0.08	0.08	0.14	0.06	2487.37	3774.23	1139.53	864.6	296.58	200.97	416.86	267.9	169.82	9010.17	6462.58	10131.8	1014.78	362.55
D061	A. thaliana	6	34341	2.57	2.57	3.86	5.29	5.14	5.86	4.57	6.14	0.43	0.34	0.46	0.55	0.49	0.77	0.51	0.79	-164836	-180459	-249020	-262963	-250201	-267331	-255340	-292973	0.3	0.56	0.45	0.35	0.42	0.27	0.35	0.11	26917.7	59533.9	34289.7	21478.3	29847.4	5823.16	22412.4	2664.97	585.53	26351.8	51251.3	17804.2	54798.4	8108.17
D062	A. thaliana	8	23644	3	3.14	4.43	5.71	5.71	5.86	2.14	6	0.4	0.22	0.3	0.3	0.31	0.89	0.18	1.04	-102288	-185216	-212866	-212791	-213463	-228260	-167057	-228107	0.39	0.69	0.6	0.58	0.58	0.34	0.75	0.3	81551.4	85875.7	47300.9	42551.9	43919.1	1884.14	138158	3884.57	443.72	17390.3	30681.3	32882.5	32217	719.3
D063	A. thaliana	8	31786	2.29	2.43	3.86	4.71	5.86	5.86	5.43	5.57	0.55	0.54	0.7	0.76	0.79	0.84	0.86	0.95	-103481	-210605	-298395	-298093	-299628	-361764	-356439	-406829	0.27	0.37	0.3	0.26	0.25	-0.02	0.13	0.03	21956.2	22816.8	15308	11837.2	11728	470.91	2145.2	476.93	1069.45	50925.8	85751.1	92574.1	92806.4	918.59
D064	A. thaliana	6	30825	1.57	3.57	4.14	4.57	5.43	5.43	5.14	6.14	0.54	0.57	0.57	0.57	0.68	0.68	0.69	0.8	-111233	-144717	-241479	-241477	-279129	-251935	-268391	-283434	0.31	0.38	0.29	0.3	0.11	0.22	0.18	0.09	26624.9	24273.1	15120	15118.8	2294.06	3945.29	5118.87	2018.01	597.5	32347.5	18542.9	18543.7	817.28	3922.91
D065	A. thaliana	9	46417	2	7.5	3.57	4.43	7.5	4.57	2	4.43	0.57	NaN	0.68	0.75	NaN	0.9	0.56	1.11	-148656	NaN	-478741	-472980	NaN	-535861	-166780	-588327	0.31	NaN	0.31	0.23	NaN	0.01	0.37	0.03	29311.8	NaN	22032.3	10773.1	NaN	624.11	93475.3	1011.16	1148.21	NaN	136181	162992	NaN	1483.4
D066	A. thaliana	6	18064	2.29	3.14	4.43	4.43	5.57	5.14	5.14	5.86	0.43	0.43	0.57	0.63	0.64	0.62	0.63	0.69	-72751.9	-84222.1	-166528	-163950	-166427	-150371	-153099	-164872	0.41	0.49	0.24	0.23	0.16	0.23	0.22	0.15	12736.9	23378	3356.85	3425.42	1609.01	3317.48	4345.22	1794.58	484.64	14377.4	600.64	839.95	450.24	2595.31
D067	A. thaliana	6	17552	2.71	3.86	4.29	4.29	5.86	5.57	3.86	5.57	0.56	0.56	0.61	0.67	0.71	0.7	0.8	0.72	-65953.5	-101524	-171711	-166219	-159432	-138493	-62538.8	-170414	0.23	0.34	0.16	0.15	0.06	0.14	0.21	0.06	9227.95	9991.54	1939.46	2236.49	1061.48	1976.66	18212.6	922.63	653.26	11965.9	337.87	623.04	659.13	5193.82
D068	A. thaliana	4	44841	1.86	3.43	3	4.29	5.86	7	5.71	4.86	0.37	0.45	0.39	0.45	0.47	0.58	0.51	0.47	-203772	-172013	-314130	-286700	-281951	-250928	-278892	-295855	0.36	0.48	0.32	0.3	0.23	0.21	0.25	0.24	33895.5	51360.3	24936.8	23469.5	17148	13572.8	18533	19295.1	446.23	29254	137.06	1261.56	1874.58	16166.5
D069	A. thaliana	4	36373	1.86	3	3.29	6.71	5	5.57	6	4.57	0.36	0.39	0.39	0.54	0.45	0.5	0.51	0.49	-139359	-150780	-245785	-207304	-241108	-194463	-230020	-226865	0.4	0.39	0.32	0.24	0.24	0.36	0.21	0.25	36515.2	27850	20244.2	12873.4	12069.7	15314.3	13171.1	13714.9	500.46	796.19	137.21	5705.01	177.5	13780.7
D070	A. thaliana	6	17262	2.57	2.29	3.43	5.71	4.71	5.43	6	5.86	0.52	0.37	0.51	0.61	0.57	0.66	0.78	0.73	-69168.8	-87377.7	-125905	-126912	-126686	-138084	-139688	-153569	0.29	0.53	0.42	0.34	0.37	0.29	0.23	0.08	11900.1	26600.4	14715.1	9917.19	11558.8	3514.44	5052.15	1011.31	484.36	13796	27915	32843.2	30972.4	3095.77
D071	A. thaliana	4	25990	1.43	3.57	3.14	4.71	6	6.29	5.57	5.29	0.29	0.43	0.39	0.46	0.51	0.49	0.52	0.45	-61995.3	-82318.2	-180303	-157404	-154542	-143931	-162760	-168635	0.45	0.48	0.33	0.32	0.27	0.3	0.26	0.24	27996.5	26843.1	14076	14215.1	8959.66	9277.91	11772.9	9279.94	82.59	5633.15	71.29	2544.74	2395.93	8098.37
D072	A. thaliana	8	17114	2.43	2.57	3.86	4.57	5.57	5.57	5.43	6	0.56	0.42	0.52	0.52	0.56	0.98	0.64	0.81	-92869.3	-97203	-166947	-166940	-164205	-166258	-167691	-176926	0.22	0.45	0.31	0.31	0.29	-0.04	0.21	0.13	10439.4	17122.4	9986.57	9979.62	8561.99	429.3	7656.54	4564.67	629.87	8301.12	12320.3	12325.7	22586.8	3182.23
D073	A. thaliana	4	20176	1.57	3.57	3.29	4.86	5.71	4.86	6.29	5.86	0.34	0.4	0.39	0.49	0.45	0.44	0.49	0.51	-50810.1	-86083.4	-134211	-120676	-120802	-108649	-122494	-125511	0.36	0.48	0.32	0.3	0.26	0.36	0.25	0.25	28266.7	22704.1	12763.5	13030.8	7981.9	11320.7	8234.22	8478.19	113.07	3510.9	90.78	1440.82	641.53	4930.5
D074	A. thaliana	4	25551	1.43	5.43	2.71	4.86	4.29	6.86	5.86	4.57	0.32	0.61	0.38	0.46	0.44	0.59	0.5	0.45	-67450.3	-103350	-170489	-149870	-168730	-138894	-152490	-160381	0.53	0.35	0.37	0.34	0.3	0.2	0.26	0.31	24971.5	16843.4	13435.8	11228.3	10656.6	8098.18	10507.6	10794.2	121.62	20746.3	92.41	2365.47	162.06	8478.37
D075	A. thaliana	5	17434	2.71	3	3.29	3.86	5.29	5	8	4.86	0.53	0.54	0.51	0.59	0.62	0.65	NaN	0.65	-84110.5	-76704	-150741	-136996	-144292	-121512	NaN	-145789	0.27	0.34	0.22	0.22	0.11	0.19	NaN	0.12	6797.6	10394.8	3000.78	4104.66	2158.7	3804.17	NaN	2308.27	830.1	8271.96	180.44	1176.07	443.66	6800.32
D076	A. thaliana	5	13218	2.29	2.71	3.71	3.86	5.29	5.29	8	4.86	0.43	0.31	0.41	0.4	0.45	0.7	NaN	0.54	-58285.4	-57936.6	-86525.3	-86430.6	-85191.9	-84340.1	NaN	-90673.7	0.35	0.6	0.41	0.42	0.4	0.22	NaN	0.29	30137.8	30914.1	13226.1	13202.9	10240.4	1899.69	NaN	8104.28	241.01	6980.81	4112.7	4118.13	8608.27	4101.89
D077	A. thaliana	14	14670	2.29	2.71	4	5	5	5.14	5.57	6.29	0.53	0.38	0.48	0.57	0.5	0.9	0.77	0.96	-86350.1	-178518	-220726	-226611	-220968	-220259	-230640	-238365	0.3	0.52	0.43	0.35	0.42	0.18	0.2	0.14	15268.9	22019.7	13609	8336.79	12761.8	901.24	4413.75	2370.29	603.17	32568	53014.5	18888.9	54651.8	1148.42
D078	A. thaliana	4	20472	1.71	4	3.14	4.29	4.57	7.29	5.86	5.14	0.34	0.49	0.39	0.42	0.44	0.55	0.48	0.48	-91587.8	-82076.5	-138004	-130023	-140047	-111457	-125987	-131908	0.42	0.39	0.34	0.34	0.28	0.27	0.27	0.27	20369.4	19300.7	12526.6	12021	8683	7879.58	9178.5	9180.8	158.11	3726.65	120.23	590.91	81.21	9487.92
D079	A. thaliana	4	22180	3	2.57	4	5.43	5.14	5.57	4.29	6	0.41	0.37	0.39	0.48	0.45	0.48	0.57	0.46	-90136.5	-83822.6	-154039	-116034	-150953	-115849	-108809	-139760	0.34	0.54	0.32	0.44	0.23	0.44	0.41	0.22	21852	35139.6	13112.8	20580.9	8876.89	20463.6	22161.7	8211.34	348.55	11933.7	63.95	22963.7	105.53	23026.9
D080	A. thaliana	24	18732	2.43	2.86	4.14	7	4.71	3.57	5.14	6.14	0.92	0.87	1.07	1.26	1.24	0.98	1.28	1.53	-88502.6	-289531	-469950	-452513	-470167	-164413	-497150	-508014	0.13	0.22	0.13	0.01	0.06	0.04	0.06	-0.01	2402.53	5914.34	2928.67	26.42	1356.03	418.96	451.06	301.59	2085.7	104185	113751	223673	92008.2	396.24
D081	S. cerevisiae	4	4865	2.71	3.86	3	6	4.29	4	6	6.14	0.47	0.45	0.39	0.55	0.43	0.42	0.47	0.49	-19289.2	-20213.7	-33544.4	-27859.5	-34554.8	-28024.4	-30348.8	-30557.2	0.31	0.44	0.33	0.3	0.27	0.37	0.22	0.24	5508.45	4661	3019.21	2458.44	2153.68	2697.02	2006.51	2147.79	75.42	1648.83	19.96	1275.97	16.83	851.54
D082	S. cerevisiae	6	4832	1.86	2.57	4	4.71	5.57	6.71	5.14	5.43	0.55	0.56	0.55	0.57	0.66	0.66	0.61	0.64	-26125.6	-24803.2	-40100.8	-39698.2	-41849.1	-38245.2	-40582.4	-43099.2	0.26	0.28	0.26	0.27	0.15	0.18	0.2	0.16	2452.49	1898.69	1906.13	1663.25	1053.02	755.07	1503.96	1107.02	165.75	308.3	960.61	1059.57	210.05	1194.25
D083	S. cerevisiae	5	4602	1.86	2.43	3.71	5.71	4.71	6.14	5.71	5.71	0.37	0.35	0.43	0.45	0.44	0.55	0.55	0.6	-19238.6	-20560.8	-28614.8	-28687.5	-28664.3	-29863.9	-30685.2	-32014.3	0.39	0.54	0.48	0.47	0.47	0.31	0.28	0.26	6281.86	6970.18	5149.45	4846.2	4924.2	1585.33	1825.08	2084.05	44.02	3175.97	5423.04	5597.14	5551.3	1404.86
D084	S. cerevisiae	4	6075	2.57	2.43	3	4.29	7.5	4	7.5	4.71	0.48	0.44	0.5	0.66	NaN	0.72	NaN	0.93	-23962.1	-19996.9	-43397.9	-36708.8	NaN	-34703	NaN	-42718.8	0.22	0.5	0.22	0.07	NaN	0.13	NaN	0.05	1424.61	3037.43	925.06	788.06	NaN	1164.69	NaN	533.43	228.68	2678.2	32.46	521.77	NaN	1493.45
D085	S. cerevisiae	10	8605	2.14	3.86	3.86	4.29	5.29	4.86	5.86	5.86	0.69	0.83	0.71	0.77	0.81	0.87	0.99	1.05	-50689.9	-60220.5	-104104	-102656	-102143	-100723	-111349	-114566	0.18	0.25	0.2	0.2	0.14	0.08	0.09	0.06	2201.22	3639.59	2091.11	2164.17	1519.19	341.7	455.78	593.74	725.07	17900.3	8672.82	12186.2	13978.2	645.16
D086	S. cerevisiae	20	6222	3.29	3.29	4.14	4.14	4.86	5	5.43	5.86	0.7	0.79	0.71	0.69	0.31	1.08	1.1	1.29	-45212.4	-76319.9	-130469	-130166	-126169	-102781	-140894	-142203	0.13	0.17	0.21	0.22	0.57	-0.08	-0.06	-0.07	648.58	1920.57	1539.12	1532.09	349.51	146.57	258.2	207.48	695.24	13436.5	23112.2	23138.4	48620.3	513.72
D087	S. cerevisiae	21	5871	2.71	2.57	3.71	5	8	4.57	4.86	4.57	0.59	0.44	0.7	0.57	NaN	1.05	1.04	1.21	-44328.6	-71143.1	-128761	-123071	NaN	-114586	-133697	-136612	0.16	0.47	0.19	0.36	NaN	-0.09	-0.02	-0.01	982.6	3406.65	1596.81	325.49	NaN	232.85	370.63	376.08	371.89	9203.99	7065.71	24321	NaN	605.1
D088	S. cerevisiae	10	6362	2.86	2.71	3.86	4	8	4.57	4.86	5.14	0.78	0.44	0.83	0.45	NaN	1.02	1.09	1.23	-37175.7	-38913.3	-81756.1	-61359.2	NaN	-70813.9	-78789.5	-88738.9	0.08	0.44	0.08	0.46	NaN	-0.07	0.01	-0.02	382.41	869.57	241.59	250.01	NaN	98.45	209.01	106.13	91.19	785.05	43.49	2703.19	NaN	30.46
D089	S. cerevisiae	4	5342	2	3.14	3	6	4	4.71	8	5.14	0.3	0.35	0.4	0.6	0.43	0.48	NaN	0.49	-14065.1	-18454.9	-36865.3	-32292.4	-37325.4	-29253.2	NaN	-33962.8	0.49	0.56	0.33	0.24	0.27	0.33	NaN	0.24	8348.41	9264.9	3346.33	1926.16	2361.26	2729.12	NaN	2065.01	49.96	2430.21	19.81	307.24	21.09	2103.78
D090	S. cerevisiae	6	5864	2.71	2.71	3.86	4	8	4.86	4.71	5.14	0.65	0.67	0.76	0.7	NaN	0.92	0.99	1.11	-25534	-34949.9	-41241.9	-43739.2	NaN	-49411	-49317.5	-58497.2	0.18	0.27	0.22	0.15	NaN	-0.12	-0.04	-0.08	743.94	2312.68	1702.42	563.77	NaN	216.55	344.46	112.72	628.96	4160.19	5880.84	1903.71	NaN	497.84
D091	S. cerevisiae	10	5439	1.57	3.43	4.71	4.43	5.86	4.71	5.14	6.14	0.6	0.7	0.76	0.84	0.85	0.8	0.84	1.01	-24389	-49641.2	-69906.7	-64869.8	-68535.2	-66194.8	-70003.7	-73794.1	0.26	0.29	0.15	0.19	0.08	0.08	0.12	0.06	1920.6	2576.52	824.26	1459.67	410.35	308.84	507.62	360.77	262.96	14578.4	1471.18	7474.77	1301.19	514.21
D092	S. cerevisiae	4	4696	2.71	2	3.29	4.57	4.43	5	8	6	0.4	0.36	0.4	0.46	0.42	0.44	NaN	0.49	-22893.2	-18416.3	-32803.6	-26464.4	-32876.7	-26681.5	NaN	-28798	0.33	0.45	0.33	0.38	0.28	0.34	NaN	0.23	4286.72	5622.32	3055.22	3786.81	2228.76	2444.97	NaN	2173.83	61.93	211.54	14.55	1367.97	16.55	865.12
D093	S. cerevisiae	8	5328	2.29	2.43	3.57	5.57	4.86	5.71	5.71	5.86	0.53	0.48	0.57	0.65	0.61	0.72	0.74	0.86	-25317.8	-37386	-49647.1	-49748.1	-49808.9	-53675.2	-55792.4	-57036.4	0.25	0.43	0.37	0.31	0.34	0.17	0.17	0.1	3372.76	4972.88	3715.91	2746.42	3177.87	636.52	852.08	658.19	236.03	8210.15	12479.1	13977.8	13268.6	758.91
D094	S. cerevisiae	11	5476	1.43	3.57	3.71	4.57	5.43	5.29	6	6	0.58	0.68	0.67	0.74	0.75	0.86	0.98	1.02	-26578.7	-45489.7	-69052	-70319	-69087.9	-69509.9	-73494.4	-76165.4	0.27	0.31	0.27	0.23	0.22	0.08	0.15	0.07	2376.83	2908.25	2101.41	1759.1	1629.4	249.11	479.35	549.67	306.17	12714.7	11299.9	7627.2	12521.6	473.88
D095	S. cerevisiae	12	5723	2.57	2.43	3.71	4.86	5.57	4.86	6	6	0.54	0.41	0.47	0.5	0.51	0.85	0.97	1.03	-32842.2	-66305.7	-75115	-75291.3	-75159	-70983.1	-83078.7	-79644.1	0.3	0.49	0.44	0.41	0.4	0.2	0.17	0.2	6227.57	7239.74	5501.82	4828.42	4619.29	545.66	683.93	873.07	328.04	13286.1	17433.6	18546.5	18921.5	500.38
D096	S. cerevisiae	6	4277	2	2.71	4.57	5.29	5.86	6.29	3.43	5.86	0.37	0.35	0.39	0.39	0.44	0.46	0.43	0.51	-23078.1	-25669.5	-31865.1	-31861.8	-33807.8	-32217.8	-14298.5	-34461.4	0.43	0.49	0.45	0.45	0.3	0.4	0.47	0.26	7023.3	5805.42	4238.16	4234.4	1987.65	2331	11733.6	2661.59	62.72	612.08	2838.99	2839.96	345.36	1595.55
D097	S. cerevisiae	6	5256	1.86	3.43	3.86	4.57	5.57	5.71	5.14	5.86	0.53	0.6	0.62	0.71	0.68	0.7	0.78	0.77	-14432.5	-27681.8	-52234.6	-41663.9	-50531.5	-42495.6	-45668.3	-51485.8	0.31	0.35	0.17	0.24	0.1	0.1	0.12	0.08	2267.51	3404.64	566.18	1612.95	402.72	542.07	653.29	407.35	137.18	6504.7	107.08	4086.05	151.82	1397.46
D098	S. cerevisiae	11	5472	2.43	2.43	3.57	4.57	5.57	5.43	5.86	6.14	0.54	0.52	0.56	0.59	0.6	0.84	0.86	1	-23948.5	-50885.3	-66878.2	-66983.9	-67015.9	-67477.4	-73851	-73237.6	0.24	0.4	0.38	0.36	0.35	0.12	0.14	0.11	3211.2	4307.14	3982.23	3532.57	3341.23	334.58	555.95	735	157.08	12180.3	17286.6	18150.1	18544.2	458.87
D099	S. cerevisiae	12	5493	1.86	3	4.29	4.86	5.29	4.86	5.71	6.14	0.51	0.54	0.57	0.64	0.6	0.85	0.93	1.17	-26531.4	-50716.6	-72474.4	-73992.7	-72603.6	-65955.5	-77961.6	-78070.1	0.33	0.38	0.37	0.32	0.35	0.2	0.19	0.16	7504.07	4790.19	3883.48	3020.85	3411.45	472.99	779.23	568.24	264.88	12004.7	19223.7	10412.6	20243	375.88
D100	S. cerevisiae	4	5497	1.71	3.29	4	4.43	6	4.71	5.86	6	0.34	0.35	0.4	0.43	0.45	0.42	0.47	0.46	-21060.5	-21635.1	-37987.2	-30146.4	-30981.5	-29852.8	-32538.8	-32911.5	0.42	0.54	0.33	0.43	0.33	0.43	0.29	0.29	8727.52	8060.97	3845.65	5092	2268.55	4690.17	2572.71	2877.33	38.07	1284.3	12.4	1401.59	449.01	1487.77
[truncated: 18 more columns]
